# Supplementary material for: Type 3 resistant starch from Canna edulis modulates obesity and obesity-related low-grade systemic inflammation in mice by regulating gut microbiota composition and metabolism
Source: Royal Society of Chemistry journal article supplement (doi:10.1039/d1fo02208c), 2021-01-01
Supplement: d1fo02208c1.pdf [file d1fo02208c1.pdf]

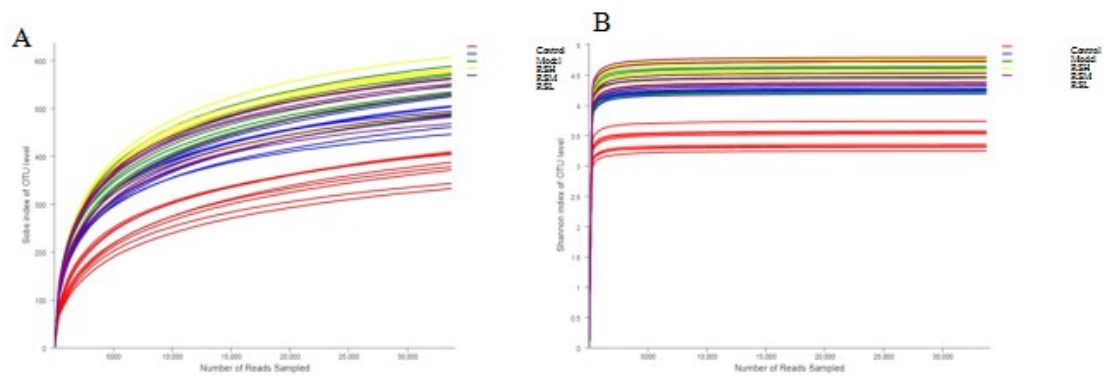

**Fig. S1.** Alpha diversity analysis of Ce-RS3-treated microbiota. A. sobs index and B. Shannon index. Means  $\pm$  SD are shown (n=8 for each group).

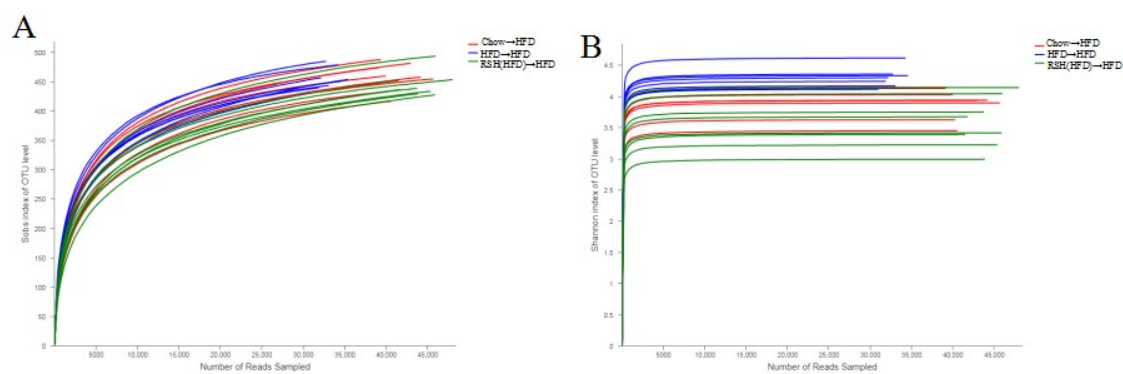

**Fig. S2.** Alpha diversity analysis of Ce-RS3-treated microbiota. A. sobs index and B. Shannon index of fecal samples from Chow, HFD, and HFD + RSH mice (n=8 for each group). Means  $\pm$  SD are shown.

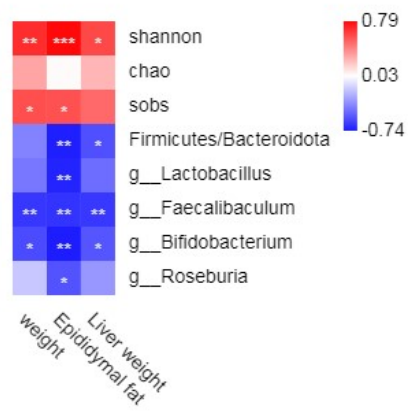

**Fig. S3.** Associations of gut microbial changes with obesity-related parameters after fecal transplantation. The  $r$  value is represented by the gradient color; red indicates positive correlation, and blue color indicates negative correlation.  $*p < 0.05$ ,  $**p < 0.01$ ,  $***p < 0.001$ .
