# Supplementary material for: Type 3 resistant starch from Canna edulis modulates obesity and obesity-related low-grade systemic inflammation in mice by regulating gut microbiota composition and metabolism
Source: Royal Society of Chemistry journal article supplement (doi:10.1039/d1fo02208c), 2021-01-01
Supplement: d1fo02208c2.pdf [file d1fo02208c2.pdf]

| Group   | Number of OTU | Taxon Tags |
|---------|---------------|------------|
| Control | 380±29        | 51146±5446 |
| Model   | 490±25        | 57452±4764 |
| RSH     | 569±34        | 61989±4980 |
| RSM     | 546±32        | 56605±4095 |
| RSL     | 525±38        | 61535±5253 |

Table S1: OTU analysis of fecal samples of mice in each group.

|      |             |                                          |          |         | Model                                             | Ce-RS3 |                 |                                                                  |
|------|-------------|------------------------------------------|----------|---------|---------------------------------------------------|--------|-----------------|------------------------------------------------------------------|
| NO.  | Metabolites | m/z                                      | RT       | Formula | vs                                                | vs     | Related Pathway |                                                                  |
|      |             |                                          |          |         | Control                                           | Model  |                 |                                                                  |
| ESI+ | 1           | L-Valine                                 | 118.0863 | 1.84    | C <sub>5</sub> H <sub>11</sub> NO <sub>2</sub>    | ↓##    | ↑               | Valine, Leucine and Isoleucine Degradation/Propanoate Metabolism |
|      | 2           | Spermidine                               | 146.1652 | 0.82    | C <sub>7</sub> H <sub>19</sub> N <sub>3</sub>     | ↑##    | ↓*              | Methionine Metabolism/Spermidine and Spermine Biosynthesis       |
|      | 3           | 4-(2-Aminophenyl)-2,4-dioxobutanoic acid | 208.0604 | 2.42    | C <sub>10</sub> H <sub>9</sub> NO <sub>4</sub>    | ↓#     | ↓**             | Tryptophan Metabolism                                            |
|      | 4           | Pantothenic acid                         | 220.1179 | 2.14    | C <sub>9</sub> H <sub>17</sub> NO <sub>5</sub>    | ↑##    | ↓*              | Beta-Alanine Metabolism/Pantothenate and CoA biosynthesis        |
|      | 5           | Ricinoleic acid                          | 299.2581 | 8.25    | C <sub>18</sub> H <sub>34</sub> O <sub>3</sub>    | ↑##    | ↓*              | Lipid metabolism/Fatty acid metabolism                           |
|      | 6           | LysoPE(14:0/0:0)                         | 426.2615 | 6.38    | C <sub>19</sub> H <sub>40</sub> NO <sub>7</sub> P | ↓##    | ↑*              | Glycerophospholipid metabolism                                   |
|      | 7           | Stearoylcarnitine                        | 428.3734 | 7.77    | C <sub>25</sub> H <sub>49</sub> NO <sub>4</sub>   | ↑##    | ↑               | Mitochondrial Beta-Oxidation of Long Chain Saturated Fatty Acids |
|      | 8           | LysoPE(16:0/0:0)                         | 454.2928 | 7.42    | C <sub>21</sub> H <sub>44</sub> NO <sub>7</sub> P | ↓##    | ↑               | Phospholipid Biosynthesis/Glycerophospholipid metabolism         |

|      |   |                          |          |      |                                                               |        |     |                                                            |
|------|---|--------------------------|----------|------|---------------------------------------------------------------|--------|-----|------------------------------------------------------------|
|      | 9 | LysoPC(14:0/0:0)         | 468.3085 | 7.96 | C <sub>22</sub> H <sub>46</sub> NO <sub>7</sub> P             | ↓##    | ↑*  | Arachidonic Acid Metabolism/Glycerophospholipid metabolism |
| ESI- | 1 | Succinic acid            | 117.0193 | 1.38 | C <sub>4</sub> H <sub>6</sub> O <sub>4</sub>                  | ↑##    | ↓*  | Arginine and Proline and Glutamate Metabolism              |
|      | 2 | Indole-3-carboxylic acid | 160.0404 | 2.64 | C <sub>9</sub> H <sub>7</sub> NO <sub>2</sub>                 | ↓#     | ↑** | Tryptophan Metabolism                                      |
|      | 3 | 3-Methyldioxyindole      | 162.0561 | 2.46 | C <sub>9</sub> H <sub>9</sub> NO <sub>2</sub>                 | ↓##    | ↑** | Tryptophan Metabolism                                      |
|      | 4 | Phenyllactic acid        | 165.0557 | 2.95 | C <sub>9</sub> H <sub>10</sub> O <sub>3</sub>                 | ↓##    | ↓** | Phenylalanine Metabolism                                   |
|      |   |                          |          |      | Model                                                         | Ce-RS3 |     |                                                            |
| NO.  |   | Metabolites              | m/z      | RT   | Formula                                                       | vs     | vs  | Related Pathway                                            |
|      |   |                          |          |      | Control                                                       | Model  |     |                                                            |
|      | 5 | Kynurenic acid           | 188.0353 | 2.32 | C <sub>10</sub> H <sub>7</sub> NO <sub>3</sub>                | ↓##    | ↓** | Tryptophan Metabolism                                      |
|      | 6 | Tryptophan               | 203.0826 | 2.33 | C <sub>11</sub> H <sub>12</sub> N <sub>2</sub> O <sub>2</sub> | ↓#     | ↑*  | Tryptophan Metabolism                                      |
|      | 7 | Palmitic acid            | 255.233  | 9.55 | C <sub>16</sub> H <sub>32</sub> O <sub>2</sub>                | ↓##    | ↑** | Lipid metabolism/Fatty acid metabolism                     |
|      | 8 | Ricinoleic acid          | 297.2435 | 7.47 | C <sub>18</sub> H <sub>34</sub> O <sub>3</sub>                | ↑##    | ↓** | Lipid metabolism/Fatty acid metabolism                     |

---

|    |                         |          |       |                                                   |     |     |                                                         |
|----|-------------------------|----------|-------|---------------------------------------------------|-----|-----|---------------------------------------------------------|
| 9  | 12-Hydroxystearic acid  | 299.2592 | 7.98  | C <sub>18</sub> H <sub>36</sub> O <sub>3</sub>    | ↑## | ↓*  | Lipid metabolism/Fatty acid metabolism                  |
| 10 | Chenodeoxycholic acid   | 391.2854 | 6.30  | C <sub>24</sub> H <sub>40</sub> O <sub>4</sub>    | ↑## | ↓*  | Bile acid biosynthesis                                  |
| 11 | 7-Ketodeoxycholic acid  | 405.2646 | 4.17  | C <sub>24</sub> H <sub>38</sub> O <sub>5</sub>    | ↑## | ↓** | Bile acid biosynthesis                                  |
| 12 | Cholic acid             | 407.2803 | 4.89  | C <sub>24</sub> H <sub>40</sub> O <sub>5</sub>    | ↑## | ↑*  | Bile acid biosynthesis                                  |
| 13 | LysoPE(14:0/0:0)        | 424.247  | 6.34  | C <sub>19</sub> H <sub>40</sub> NO <sub>7</sub> P | ↓## | ↑*  | Glycerophospholipid metabolism                          |
| 14 | LysoPE(15:0/0:0)        | 438.2625 | 6.70  | C <sub>20</sub> H <sub>42</sub> NO <sub>7</sub> P | ↓## | ↑   | Glycerophospholipid metabolism                          |
| 15 | 3-Sulfodeoxycholic acid | 457.2232 | 4.23  | C <sub>23</sub> H <sub>38</sub> O <sub>7</sub> S  | ↑## | ↑*  | Bile acid biosynthesis                                  |
| 16 | LysoPE(18:0/0:0)        | 480.3096 | 8.46  | C <sub>23</sub> H <sub>48</sub> NO <sub>7</sub> P | ↓## | ↑*  | Glycerophospholipid metabolism                          |
| 17 | LysoPA(18:0/0:0)        | 483.2728 | 10.66 | C <sub>21</sub> H <sub>43</sub> O <sub>7</sub> P  | ↓## | ↑*  | Cardiolipin Biosynthesis/Glycerophospholipid metabolism |

---

**Table S2.** Potential biomarker information. The up (↑) and down (↓) arrows represent the relative increasing or decreasing trend of the metabolites, “—” represents no relative differences between two group. #  $p < 0.05$ , ##  $p < 0.01$  model versus the control group, \*  $p < 0.05$ , \*\* $p < 0.01$ , RS3 and Met versus the Model group.

| Target genes  | Forward primer                         | Reverse primer                         |
|---------------|----------------------------------------|----------------------------------------|
| ZO-1          | 5'-<br>ACCCGAAACTGATGCTGTGGA<br>TAG-3' | 5'-<br>AAATGGCCGGGCAGAACTTGT<br>GTA-3' |
| Occludin      | 5'-ATGTCCGGCCGATGCTCTC-<br>3'          | 5'-<br>TTTGGCTGCTCTTGGGTCTGTA<br>T-3'  |
| TNF- $\alpha$ | 5'-<br>TAGCCAGGAGGGAGAACAGA-<br>3'     | 5'-<br>TTTTCTGGAGGGAGATGTGG-3'         |
| IL-1 $\beta$  | 5'-TTGAAGAAGAGCCCATCCTC<br>-3'         | 5'-CAGCTCATATGGGTCCGAC -<br>3'         |
| IL-6          | 5'-CCGGAGAGGAGACTTCAC-3'               | 5'-TCCACGATTTCCCAGAGA-3'               |
| IL-10         | 5'-<br>GCTCTTACTGACTGGCATGAG -<br>3'   | 5'-<br>CGCAGCTCTAGGAGCATGTG-3'         |

Table S3. Primers used in this study.
